1 **Title: Estimating the seroincidence of scrub typhus using antibody dynamics following**  
2 **infection**

3  
4  
5 **Authors:** Kristen Aiemjoy<sup>1,2</sup>, Nishan Kutawal<sup>3</sup>, Krista Vaidya<sup>1</sup>, Sony Shrestha<sup>3</sup>, Melina Thapa<sup>3</sup>,  
6 Peter Teunis<sup>4</sup>, Isaac I. Bogoch<sup>5</sup>, Paul Trowbridge<sup>6</sup>, Pacharee Kantipong<sup>7</sup>, Stuart D. Blacksell<sup>8,9</sup>,  
7 George M Varghese<sup>10</sup>, Richard Maude<sup>8,9,11,12</sup>, Dipesh Tamrakar<sup>3</sup>, Jason R. Andrews<sup>13</sup>  
8  
9

10 **Affiliations:**

- 11 1. Department of Public Health Sciences, University of California Davis School of Medicine, Davis,  
12 CA, USA  
13 2. Department of Microbiology and Immunology, Faculty of Tropical Medicine, Mahidol University,  
14 Bangkok Thailand  
15 3. Dhulikhel Hospital, Kathmandu University Hospital, Dhulikhel, Nepal  
16 4. Center for Global Safe Water, Sanitation and Hygiene, Hubert Department of Global Health,  
17 Rollins School of Public Health, Emory University, Atlanta, GA, USA  
18 5. Department of Medicine, University of Toronto, Toronto, ON, Canada  
19 6. Michigan State University School of Human Medicine, Grand Rapids, MI, USA  
20 7. Department of Internal Medicine, Chiangrai Prachanukroh Hospital, Chiang Rai, Thailand  
21 8. Mahidol-Oxford Tropical Medicine Research Unit, Faculty of Tropical Medicine, Mahidol  
22 University, Bangkok Thailand  
23 9. Centre for Tropical Medicine and Global Health, Nuffield Department of Medicine, University of  
24 Oxford, Oxford, UK  
25 10. Department of Infectious Diseases, Christian Medical College, Vellore, India  
26 11. The Open University, Milton Keynes, UK  
27 12. School of Public Health, Li Ka Shing Faculty of Medicine, University of Hong Kong, Hong Kong  
28 Department of Medicine, Stanford University School of Medicine, Stanford, CA, USA  
29 13. Division of Infectious Diseases and Geographic Medicine, Stanford University School of  
30 Medicine, Stanford, CA, USA  
31  
32

33 **Corresponding Author:**

34 Kristen Aiemjoy  
35 Assistant Professor  
36 Division of Epidemiology  
37 Department of Public Health Sciences,  
38 University of California Davis School of Medicine, Davis, CA, USA  
39 [kaiemjoy@ucdavis.edu](mailto:kaiemjoy@ucdavis.edu)  
40  
41  
42

43 **Word Count:** 2620  
44

45 **Abstract**

46

47 Introduction: Scrub typhus is an acute febrile illness caused by the bacterium *Orientia*  
48 *tsutsugamushi*. Characterizing the population-level burden of scrub typhus is challenging due to  
49 the lack of accessible and accurate diagnostics. We describe a new approach using information  
50 about seroresponse after infection to generate population-level scrub typhus seroincidence  
51 estimates.

52

53 Methods: We use data from two clinical studies of scrub typhus patients enrolled in Chiang Rai,  
54 Thailand, and Vellore, India, and representative population data from two serosurveys in and  
55 around the Kathmandu valley, Nepal, and Vellore, India. The samples were tested for IgM and IgG  
56 responses to *Orientia tsutsugamushi*-derived recombinant 56-kDa antigen using commercial  
57 ELISA kits. We used Bayesian hierarchical models to fit two-phase models to the antibody  
58 responses from scrub typhus cases and used the joint distributions of the peak antibody titers and  
59 decay rates to estimate population-level incidence rates in the cross-sectional serosurveys. We  
60 compared this new method to a traditional cut-off-based approach for estimating seroincidence.

61

62 Results: Among 18 to 29-year-olds, the seroincidence of scrub typhus was 886 (95% CI 432-1817)  
63 per 100,000 person-years in India and 945 (95% CI: 616-1449) per 100,000 in Nepal.  
64 Seroincidence rose with age, reaching a rate of 3231 (95% CI: 2630-3969) per 100,000 among 50  
65 to 89-year-olds in Vellore, India. The seroincidence rates estimated using a cutoff were half the  
66 rates we estimated using antibody dynamics.

67

68 Conclusion: The approach described here can be deployed prospectively, coupled with existing  
69 serosurveys, or leverage banked samples to rapidly characterize scrub typhus burden and  
70 generate scrub typhus seroincidence estimates that are comparable across populations, regions,  
71 and time.

72

73 Keywords: *Orientia tsutsugamushi*, *Scrub Typhus*, *Antibody kinetics*, *Seroepidemiology*, *incidence*

74

75

76

77

78

79

80

## 81 **Introduction**

82 Scrub typhus, an acute febrile illness caused by the bacterium *Orientia tsutsugamushi* (OT), is an  
83 important, under-recognized etiology of fever (1). Once thought to be restricted to the  
84 “tsutsugamushi triangle”, a region spanning from Russia to Pakistan, Australia, and Japan, recent  
85 studies have identified scrub typhus transmission in South America, Africa, and the Middle East  
86 (2–4). Infections occur when trombiculid mite chiggers (larvae) enter a host’s skin through hair  
87 follicles and feed on lysed skin tissue. The mites, both vectors and reservoirs of OT, feed on  
88 various mammals, including humans and rodents (5). In humans, symptoms are non-specific and  
89 include fever, myalgia, headache, gastrointestinal symptoms, and rash. An eschar is found at the  
90 inoculation site in a variable proportion of cases and is frequently missed on clinical examination.  
91 Case fatality rates are estimated to be 1-2% among treated patients and 6% among untreated  
92 patients (6).

93  
94 Determining where scrub typhus transmission occurs is critical to inform public health interventions  
95 and research priorities. Clinical incidence underestimates the true underlying burden of disease  
96 due to non-specific symptoms and the lack of accessible and accurate diagnostics (7). Periodic  
97 serosurveillance studies across endemic countries have demonstrated significant heterogeneity in  
98 seroprevalence within and between countries(8). However, directly comparing seroprevalence is  
99 not straightforward because of differences in the age distributions of each sampled population and  
100 uncertainty in antibody-waning patterns.

101  
102 Here, we apply a novel analytic approach to estimate scrub typhus seroincidence using antibody  
103 decay information from confirmed cases. The decay of antibody concentrations defines a timescale  
104 for inferring when an infection occurred. This approach does not depend on classification using  
105 cutoffs, which have been difficult to derive for scrub typhus across locations with varying forces of

106 infection(9). We first model longitudinal IgG and IgM antibody responses to OT-derived antigens  
107 among confirmed scrub typhus cases in Thailand and India and then use these parameters to  
108 estimate scrub typhus seroincidence from cross-sectional population serosurveys in Nepal and  
109 India.

110

111

## 112 **Methods**

### 113 Study populations and enrollment

114 *Longitudinal scrub typhus cases:* We used antibody responses measured from confirmed scrub  
115 typhus patients in Thailand and India. In Thailand, hospitalized patients >15 years old with acute  
116 fever duration <2 weeks were recruited from a fever surveillance study in Prachanukhao Hospital  
117 in Chiang Rai, Thailand (10,11). Enrollment occurred from August 2007 to August 2008. Patients  
118 confirmed to be infected with scrub typhus were defined by meeting at least one of the following  
119 criteria: (1) *In vitro* isolation of *O. tsutsugamushi*, (2) a  $\geq 4$ -fold rise in IgM titer in paired serum  
120 samples when tested by the indirect immunofluorescence assay, (3) a positive result in at least two  
121 out of the three PCR assays described in Paris et al., 2011(11). Serum samples were collected at  
122 admission and stored at  $-80^{\circ}\text{C}$  until testing. In India, serum samples were collected from  
123 individuals infected with scrub typhus who were > 18 years old and sought care at Christian  
124 Medical College Teaching hospital in Vellore, India, between December 2011 and March 2015.  
125 Confirmed patients with scrub typhus were defined by a positive IgM ELISA (optical density (OD)  
126 >0.8) and a positive PCR for *O. tsutsugamushi*. The serum samples were collected cross-  
127 sectionally from retrospective cases with diagnoses between 2 months and 3.5 years prior. Serum  
128 samples were collected in the patient's household, stored at  $-80^{\circ}\text{C}$ , and processed within two  
129 weeks of collection.

130

131 *Population samples:* In Nepal, we enrolled a geographically random, population-based cross-  
132 sectional sample of individuals aged 0 to 25 years from the catchment areas of Kathmandu  
133 University Teaching Hospital in Kathmandu (urban), and Dhulikhel Hospital in Kavrepalanchok,  
134 Nepal (periurban and rural) (12). Within catchment areas, we randomly selected geographically  
135 defined grid clusters and enumerated all households in each cluster. From this census, we  
136 randomly selected individuals and sought consent. We collected capillary blood samples from  
137 consenting participants onto TropBio™ filter papers (Cellabs Pty Ltd., Brookvale, New South  
138 Wales, Australia). The samples were air-dried for at least two hours at room temperature, then  
139 stored with desiccant in individual plastic bags at -20 °C until processing. Study participants were  
140 enrolled between February 2019 and Jan 2021. In India, we utilized a previously-conducted cross-  
141 sectional serosurvey for scrub typhus conducted from September 2014 to December 2014(13).  
142 The study enrolled adults ≥18 years of age in the Vellore District of Tamil Nadu in South India. A  
143 two-stage clustered sample design was used to randomly select communities and individuals(13).  
144 Venous blood was collected from consenting participants, transported on ice, and stored at -70°C  
145 until tested.

146

#### 147 Laboratory methods

148 All samples were tested using IgM and IgG responses to *O. tsutsugamushi*-derived recombinant  
149 56-kDa antigen using the Scrub Typhus Detect ELISA kit (InBios International, Inc., Seattle, WA,  
150 USA)(10) performed as per the manufacturer's instructions. All serum samples were tested at a  
151 1:100 dilution, and the results were read at 450 nm using a microplate reader (Thermo Scientific  
152 Multiskan FC) to generate a final optical density result (optical density (OD) at 450 nm). To prepare  
153 the dried capillary blood samples used in Nepal, we cut two filter paper protrusions and submerged

154 them in 133  $\mu\text{L}$  of 1XPBS 0.05% Tween buffer overnight at 4 C, then centrifuged to recover the  
155 eluates. The eluate was assumed to be equivalent to a 1:10 dilution of plasma.

156

### 157 Statistical methods

158 We estimated seroincidence in two ways: 1) by deriving it from the age-dependent seroprevalence  
159 and 2) as a function of the longitudinal antibody dynamics after infection. For method 1, we used  
160 finite mixture models to determine the IgG seropositivity cutoffs using the mean plus three standard  
161 deviations of the first mixture component (14). We calculated IgG seroprevalence as the proportion  
162 of individuals classified as IgG seropositive. We then used an exponential survival model to derive  
163 seroincidence (equations 1 & 2), where  $\pi(a)$  equals the seroprevalence at age ( $a$ ) and  $\lambda$  equals  
164 the seroincidence rate.

165

166 
$$\text{eq 1.} \quad \pi(a) = 1 - e^{-\lambda a}$$

167

168 
$$\text{eq 2.} \quad \lambda = \frac{(-\log_{10} (1 - \pi(a)))}{a}$$

169

170 We fit a generalized linear model to the binomial seropositivity outcome conditional on age with a  
171 complementary log-log link and estimated seroincidence from the model's intercept term (15,16).  
172 This approach assumes there is no antibody waning over time and that seroincidence is constant  
173 over age. To evaluate how seropositivity changes over age, we fit generalized additive models (17)  
174 with a cubic spline for age and simultaneous confidence intervals using a parametric bootstrap of  
175 the variance-covariance matrix of the fitted model parameters (18).

176

177 For method 2, we used information about antibody decay from confirmed cases to estimate  
178 seroincidence. First, we modeled longitudinal antibody dynamics after scrub typhus infection using  
179 two-phase models with an infection episode characterized by an exponential rise in antibody

180 response and a non-exponential power function decay (19–21). We model antibody kinetics from  
181 onset of fever ( $t = 0$ ) with initial antibody levels of  $y_0$  reaching a peak antibody response of  $y_1$ . We  
182 used a Bayesian hierarchical framework to estimate the above models for IgG and IgM (19,20) and  
183 generate joint distributions using Markov chain Monte Carlo (MCMC) sampling, allowing for  
184 individual variation. We implemented the models in R version 4.1.3 using JAGS(22).

185

186 We used the distributions of peak antibody response and the decay rate and shape to estimate  
187 seroincidence in the cross-sectional population samples(23). We created a likelihood function for the  
188 observed cross-sectional population data based on the longitudinal kinetics following scrub typhus  
189 infection with the assumption that incident infections occur as a Poisson process with rate lambda  
190 ( $\lambda$ )(24). We generated maximum likelihood profiles for  $\lambda$  using each isotype separately and jointly by  
191 combining their likelihood functions. We accounted for two sources of noise in the observed serologic  
192 responses: measurement noise of the assay and biologic noise as detailed in Teunis et. al. (23).

193

#### 194 Ethics statement

195 Institutional Review Boards in India (Christian Medical College, Vellore), Thailand (Chiang Rai  
196 Hospital, the Faculty of Tropical Medicine, Mahidol University, and the Thai Ministry of Public  
197 Health), The United States (Stanford University Institutional Review Board), and Nepal (Nepal  
198 Health Research Council Ethical Review Board)) approved the study forms and protocols.

199

#### 200 **Results**

201 For the longitudinal cases, ELISA antibody responses were measured from 253 patients with scrub  
202 typhus; 84 in Thailand and 211 in India(25). Only one serum sample was available per participant,  
203 between 1 day and 1250 days after the date of symptom onset (median 440 days, inter-quartile

204 range (IQR): 140-840). The samples from Thailand were collected between 1 and 11 days after  
205 symptom onset (median 5.5) and the samples in India were collected between 65 and 1250 days  
206 after symptom onset (median 599). Both cohorts measured IgM responses, but IgG responses  
207 were only available from the India cohort (Figure 1). The median ages of participants were 46  
208 years (IQR 35-56); 47 in India (IQR 35-57), and 43 in Thailand (IQR 35-51) (Table 1).

209

210 **Table 1: Summary of longitudinal scrub typhus patient data**

211

|                                 | India<br>(N=211) | Thailand<br>(N=42) | Overall<br>(N=253) |
|---------------------------------|------------------|--------------------|--------------------|
| <b>Age (years)</b>              |                  |                    |                    |
| Median (IQR)                    | 47 (35 - 57)     | 43 (35 - 51)       | 46 (35 - 56)       |
| Missing                         | 0 (0%)           | 1 (2.4%)           | 1 (0.4%)           |
| <b>Days since symptom onset</b> |                  |                    |                    |
| Median (IQR)                    | 520 (340 - 880)  | 5.5 (4.0 - 7.0)    | 440 (140 - 840)    |

212

213

214 Median IgM responses were elevated above the kit cut-off for 6.65 months after symptom onset  
215 and above the mixture model cut-off for 9.4 months after symptom onset. Median IgG responses  
216 were elevated above the kit cut-off for 31.5 months after symptom onset and above the mixture  
217 model cut-off for 29.7 months after symptom onset (Figure 2A). As expected, IgM responses had a  
218 faster decay rate than IgG responses. Peak IgM responses were higher than IgG responses. The  
219 time-to-peak response was similar between IgG and IgM. The model-predicted baseline IgG  
220 responses were higher than baseline IgM (Figure 2B).

221

222 For the population data, ELISA antibody responses were measured from 721 participants in

223 Vellore, India, and 1105 participants in Kathmandu and Kavre districts, Nepal. The median age of



224 participants was 49 in India (IQR 40-62) and 11 in Nepal (IQR 5.5-17). In India, 63.2% (456/721) of  
225 participants were female, compared to 48.7% (538/1105) in Nepal (Table 2).

226

227 **Table 2: Population data summary**

228

|                                   | India<br>(N=721) | Nepal<br>(N=1105) |
|-----------------------------------|------------------|-------------------|
| <b>Age, in years</b>              |                  |                   |
| Median (IQR)                      | 49 ( 40 - 62)    | 11 ( 5.5 - 17)    |
| <b>Age, in years, Categorical</b> |                  |                   |
| 0-17                              | 0 (0%)           | 876 (79.3%)       |
| 18-29                             | 59 (8.2%)        | 229 (20.7%)       |
| 30-49                             | 302 (41.9%)      | 0 (0%)            |
| 50-89                             | 360 (49.9%)      | 0 (0%)            |
| <b>Gender</b>                     |                  |                   |
| Female                            | 456 (63.2%)      | 538 (48.7%)       |
| Male                              | 265 (36.8%)      | 567 (51.3%)       |
| <b>Residence zone</b>             |                  |                   |
| Rural                             | 177 (24.5%)      | 316 (28.6%)       |
| Periurban                         | 284 (39.4%)      | 319 (28.9%)       |
| Urban                             | 190 (26.4%)      | 470 (42.5%)       |
| Missing                           | 70 (9.7%)        | 0 (0%)            |
| <b>Occupation</b>                 |                  |                   |
| Agriculture                       | 85 (11.8%)       | 0 (0%)            |
| Labor & Manufacturing             | 181 (25.1%)      | 14 (1.3%)         |
| Minor, <=18 years                 | 1 (0.1%)         | 880 (79.6%)       |
| None                              | 343 (47.6%)      | 152 (13.8%)       |
| Other                             | 21 (2.9%)        | 21 (1.9%)         |
| Professional                      | 44 (6.1%)        | 26 (2.4%)         |
| Service                           | 46 (6.4%)        | 12 (1.1%)         |
| <b>Household size</b>             |                  |                   |
| Median (IQR)                      | 4.0 ( 3.0 - 5.0) | 4.0 ( 4.0 - 6.0)  |
| Missing                           | 3 (0.4%)         | 1 (0.1%)          |

229

230 In both India and Nepal, the seroprevalence of scrub typhus infection increased with age (Figure  
 231 3). In Vellore, India the overall seroprevalence was 29.7% (95% CI 26.3-33.3): growing from 10.2%  
 232 (95% CI 2.4-17.9) among 18-29-year-olds to 37.8% (95% CI 32.8-42.8) among 50 to 89-year-olds.  
 233 In Kathmandu and Kavre, Nepal, the overall seroprevalence was 1.1% (95% CI 0.5-1.7), rising  
 234 from 0.1% (95%CI 0-.3) among 0 to 17-year-olds to 4.8% (95%CI 2-7.6%) among 18-29-year-olds  
 235 (Table 3).

236

237 **Table 3: Age-specific seroprevalence and seroincidence in Nepal and India**

238

| Age          | N    | N IgG seropositive | IgG seroprevalence (95% CI) | Seroincidence per 100,000 person-years (95% CIs) |                                                |
|--------------|------|--------------------|-----------------------------|--------------------------------------------------|------------------------------------------------|
|              |      |                    |                             | IgG antibody kinetics                            | Derivative of age-dependent IgG seroprevalence |
| <b>India</b> |      |                    |                             |                                                  |                                                |
| 0-17         | 0    | 0                  | –                           | –                                                | –                                              |
| 18-29        | 59   | 6                  | 10.2% (2.4-17.9)            | 886 (432-1817)                                   | 431 (194-958)                                  |
| 30-49        | 302  | 72                 | 23.8% (19.0-28.7)           | 1602 (1254-2046)                                 | 675 (535-851)                                  |
| 50-89        | 360  | 136                | 37.8% (32.8-42.8)           | 3231 (2630-3969)                                 | 757 (639-897)                                  |
| Overall      | 721  | 214                | 29.7% (26.3-33.0)           | 2199 (1893-2555)                                 | 712 (622-815)                                  |
| <b>Nepal</b> |      |                    |                             |                                                  |                                                |
| 0-17         | 876  | 1                  | 0.1% (-0-0.3)               | 212 (120-374)                                    | 13 (2-90)                                      |
| 18-29        | 229  | 11                 | 4.8% (2.0-7.6)              | 945 (616-1449)                                   | 232 (128-419)                                  |
| 30-49        | 0    | 0                  | –                           | –                                                | –                                              |
| 50-89        | 0    | 0                  | –                           | –                                                | –                                              |
| Overall      | 1105 | 12                 | 1.1% (0.5-1.7)              | 425 (303-596)                                    | 95 (54-168)                                    |

239

240

241 In Vellore, India, the overall scrub typhus seroincidence rate was 2199 per 100,000 person-years  
242 (95% CI: 1893-2555) using IgG antibody dynamics. Seroincidence rose with age; growing from 886  
243 (95% CI 432-1817) to 3231 (95% CI 2630-3969) among 50-89-year-olds. In the Kathmandu valley  
244 of Nepal, the overall seroincidence was 425 per 100,000 person-years, also rising with age from  
245 212 (95% CI 120-374) per 100,000 person-years among 0 to 17-year-olds to 945 (95%CI 616-  
246 1449) among 18 to 29-year-olds. In both Nepal and India, the overall seroincidence using antibody  
247 dynamics was more than double the seroincidence derived from the age-dependent IgG-  
248 seroprevalence (Table 3). In both sites, scrub typhus seroincidence varied by resident zones. In  
249 Vellore, India, seroincidence was highest in periurban settings, followed by rural and then urban,  
250 whereas in Nepal, seroincidence was higher in urban settings (Figure 4). In India, females had  
251 elevated seroincidence rates compared to males across all age groups (Figure 4).

252

253

## 254 **Discussion**

255 We describe a new approach for generating population-level scrub typhus seroincidence estimates  
256 from cross-sectional serosurveys. Seroincidence, the number of new infections in a population per  
257 year, characterizes transmission intensity and is highly informative for determining where and  
258 among whom infection burden is highest. While classic approaches for estimating seroincidence  
259 require cutoff points and ignore antibody waning overtime, in this approach we use the antibody  
260 decay trajectories from confirmed cases to estimate seroincidence. We show here that ignoring  
261 antibody waning and using a cutoff to calculate scrub typhus seroincidence underestimates the  
262 rate by at least half.

263

264 Understanding the post-infection antibody kinetics of scrub typhus is also important for guiding the  
265 clinical interpretation of ELISA antibody response data. Using data from patients infected with

266 scrub typhus in Thailand and India, we found that median IgM responses remained elevated above  
267 the ELISA kit threshold for six and a half months after symptom onset. IgG responses remained  
268 elevated above the ELISA kit threshold for over 24 months after symptom onset. These findings  
269 are relevant to clinicians who should therefore interpret elevated IgM and IgG responses from a  
270 single sample with caution given the many local causes of fever unrelated to scrub typhus.

271

272 Most scrub typhus seroepidemiologic studies dichotomize IgG responses using a cutoff threshold  
273 and then calculate the proportion of the population whose values fall above that threshold  
274 (seroprevalence). Cutoff thresholds are notoriously challenging to calculate and can vary across  
275 regions and studies (9), making it challenging to compare seroprevalence results across regions  
276 and time. The approach we describe in this paper has the advantage of not requiring a set cutoff  
277 point. Additional strengths of the approach are that it incorporates information about measurement  
278 noise, biologic noise, and age to generate more accurate uncertainty intervals around  
279 seroincidence estimates.

280

281 We show here that seroprevalence is highly age-dependent; therefore, the age of the patients will  
282 influence the overall seroprevalence estimate. In our study populations, the overall seroprevalence  
283 was much higher in India than in Nepal; however, in India, the median age of patients was 49  
284 years compared to the median age of 11 years in Nepal. Despite differences in overall  
285 seroprevalence rates, the seroincidence rate among 18 to 29-year-olds in India and Thailand were  
286 similar, although there may be micro-geographic differences in infection risk based on elevation,  
287 vegetation, climate, and other factors

288

289 The results of this study should be interpreted within the context of several limitations. First, only  
290 one sample was available from each patient with scrub typhus, limiting our precision in estimating

291 individual-level heterogeneity in decay rates. Moreover, with just one sample per individual, we  
292 were unable to identify and remove potential reinfections. We hypothesize that individuals who are  
293 re-exposed to scrub typhus will have elevated IgG responses; when these observations remain in  
294 the data, our antibody decay rates will be biased towards slower decay. An additional limitation of  
295 the available case data is that we had no early data on IgG responses and no responses from  
296 children less than 15 years old. It is possible that antibody dynamics among young children are  
297 different from those among older individuals, and these dynamics would influence the accuracy of  
298 seroincidence estimates among younger ages. Future studies that enroll patients infected with  
299 scrub typhus across ages and follow the same individuals over time are needed to refine the  
300 longitudinal antibody decay rates, accurately define peak IgG responses, explore the influence of  
301 reinfections on antibody kinetics and investigate the potential influence of age on antibody kinetics.

302

303 Scrub typhus remains an important but underrecognized etiology of acute fever with endemicity  
304 expanding globally. There is a critical need for low-cost, accurate tools to quantify the burden of  
305 scrub typhus infections to inform public health decision-making. We describe a sero-surveillance  
306 approach that can efficiently generate population-level scrub typhus seroincidence estimates. This  
307 approach can be deployed prospectively, coupled with existing serosurveys, or leverage banked  
308 samples to rapidly characterize scrub typhus burden and generate estimates that are comparable  
309 across populations, regions, and time.

310

311

### 312 **Acknowledgments**

313

314 We gratefully acknowledge the study participants for their valuable time and interest in participating  
315 in these studies.

316

317

318 **Funding**

319 This work was supported by the Fogarty International Center at National Institutes of Health [K01

320 TW012177-01A1]

321

322

323

324 **Figures**

325

326 **Figure 1: Quantitative antibody responses among (A) Scrub Typhus Cases and (B,C) population**

327 **serosurveys in Nepal and India. Anti-OT IgA and IgG responses are measured using kinetic enzyme-**

328 **linked immunosorbent assays (ELISAs) and depicted on the y-axis of all plots. The horizontal dashed**

329 **line denotes the kit cutoff (light grey) and the mixture model cutoff (dark grey). In panel A, responses**

330 **are compared over time from fever onset among confirmed cases from Thailand and India. Each dot is**

331 **an individual case, the overlaying boxplots indicate the median and the inter-quartile range. Panel B**

332 **shows the distribution of responses among the population-based samples in India and Nepal. Panel C**

333 **shows the antibody among the population-based samples in India and Nepal as a function of age.**

334

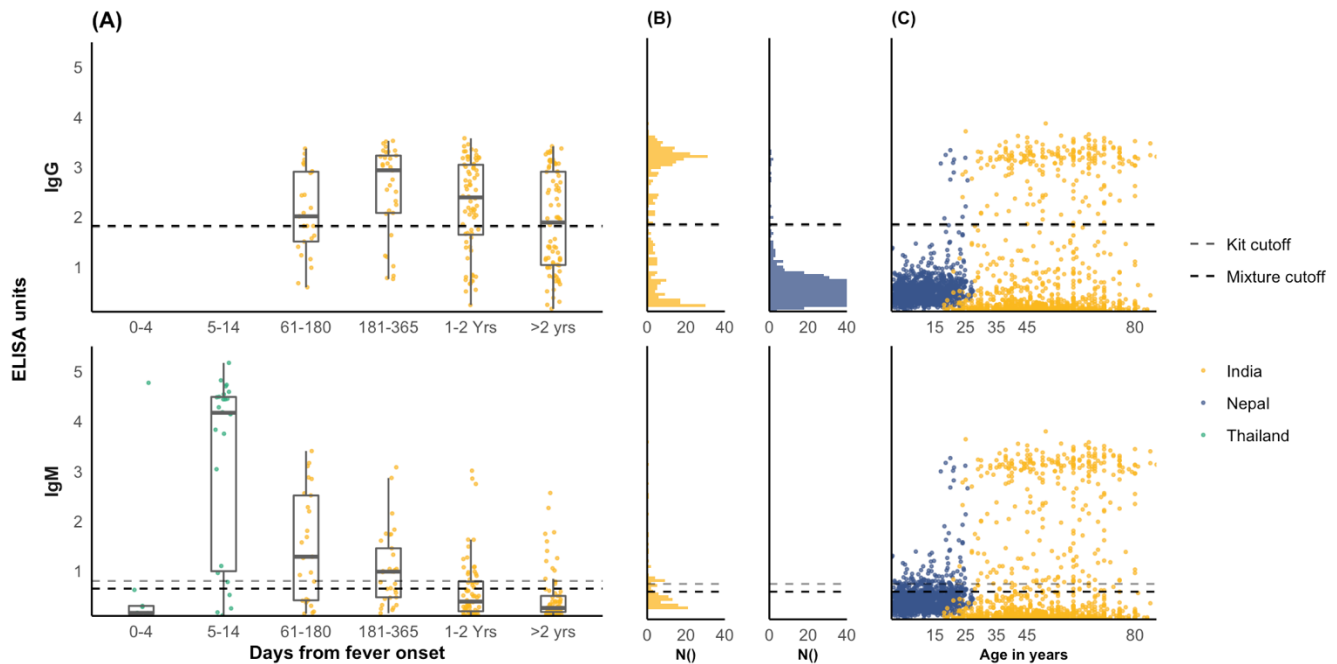

335

336

337

338

339

340

341

342

343

344

345

346  
347  
348  
349  
350  
351  
352  
353  
354  
355  
356  
357

**Figure 2: (A) Kinetics of IgM responses among Scrub Typhus cases and (B) Distributions of model-predicted peak antibody response, decay rate and shape, time to peak antibody response, and baseline antibody response.** Longitudinal antibody dynamics were modeled from ELISA-measured antibody responses using Bayesian hierarchical models. In panel A, the points are the observed individual antibody concentrations; each point indicates one patient. The dark solid line indicates the median, and dotted lines indicate 95% credible intervals for the model-fitted antibody decay concentrations. The horizontal dashed line denotes the kit cutoff (light grey) and the mixture model cutoff (dark grey). Panel B shows distributions and boxplots for the model-predicted decay rate, decay shape, time to peak, baseline response, and peak antibody responses for both IgM and IgG.

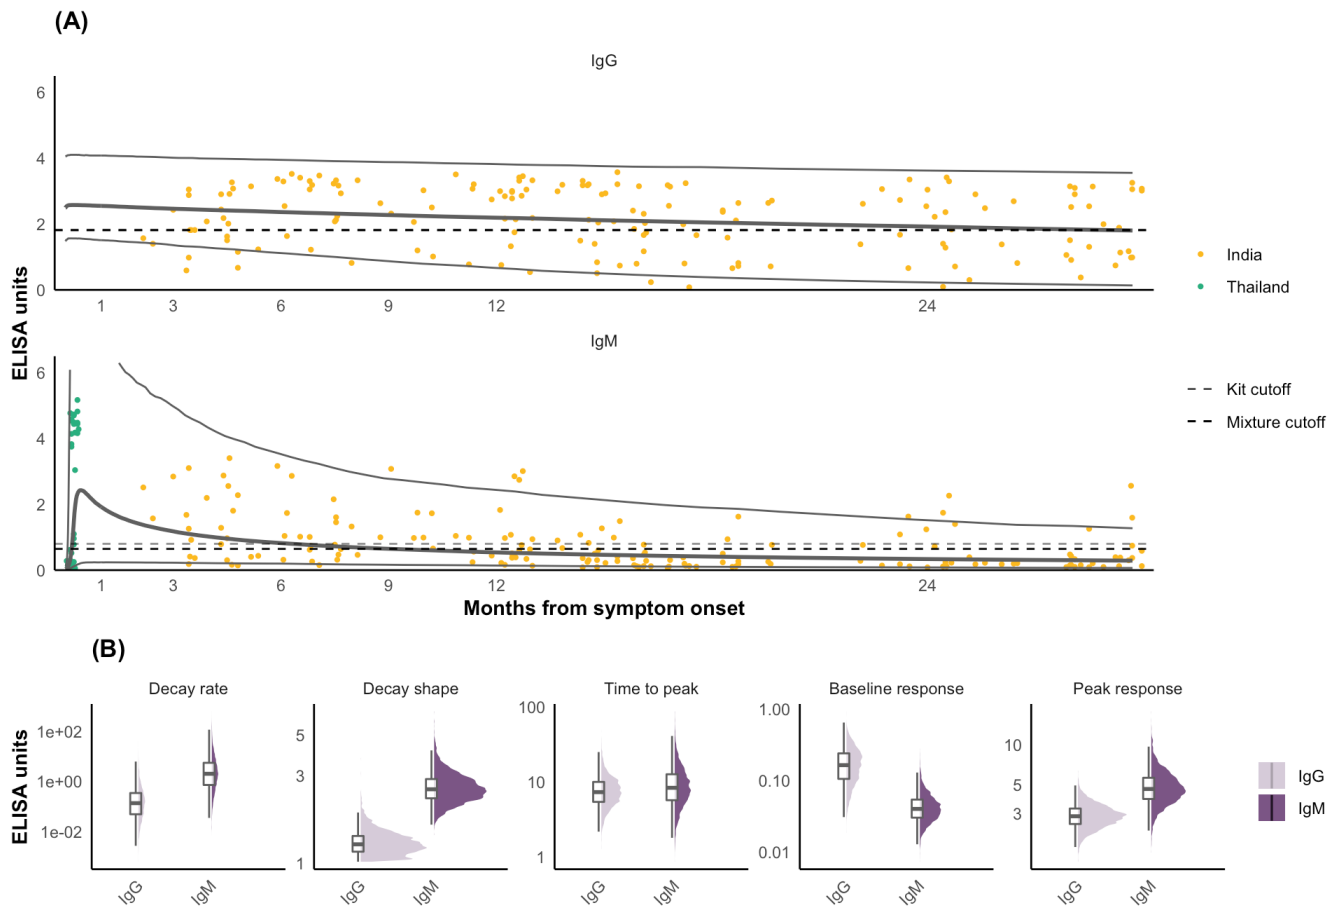

358  
359  
360  
361  
362  
363  
364  
365  
366  
367  
368

369  
370  
371  
372  
373  
374  
375  
376

### Figure 3: Age-dependent seroprevalence

Seroprevalence is depicted as a function of age. Seroprevalence was determined using the mixture-model derived cutoff for IgG responses. The age-dependent seroprevalence was modeled using a generalized additive model with with a cubic spline for age and simultaneous confidence intervals using a parametric bootstrap of the variance-covariance matrix of the fitted model parameters.

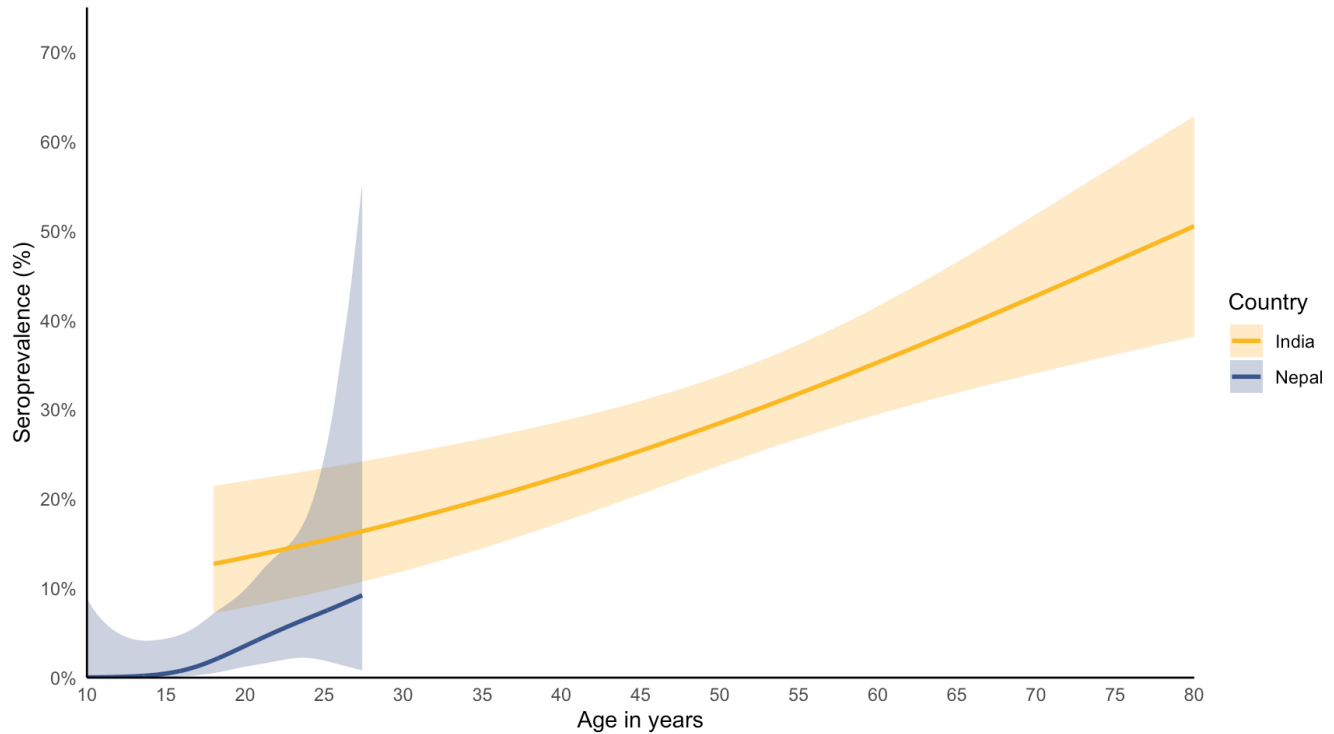

377  
378  
379  
380  
381  
382  
383  
384  
385  
386  
387  
388  
389  
390  
391  
392  
393  
394  
395  
396



397

398 **Figure 4: Seroincidence by age plus (A) resident zones and (B) gender**

399 Seroincidence rates across are shown across age strata, residence zone (A), and gender (B)  
400 comparing the India and Nepal population samples. Seroincidence is estimated using IgG antibody  
401 kinetics. The point represents the incidence estimate per 100,000 person-years, and the bar  
402 indicates the 95% confidence interval.

(A)

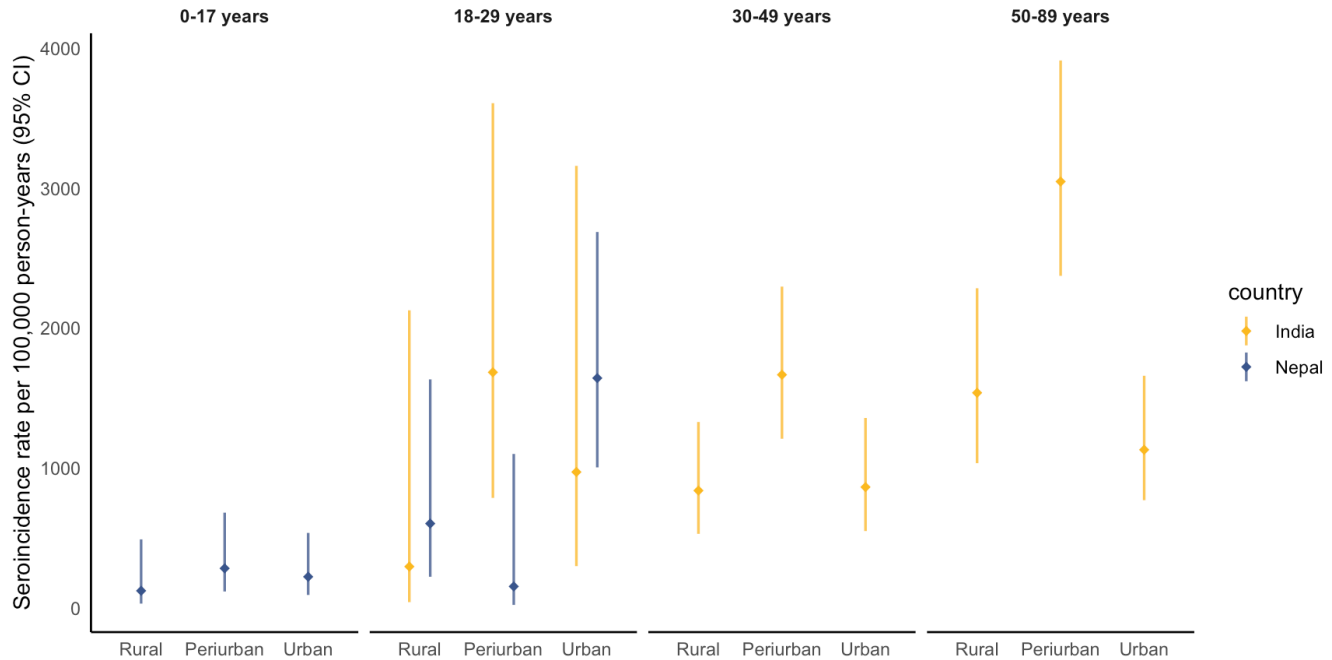

(B)

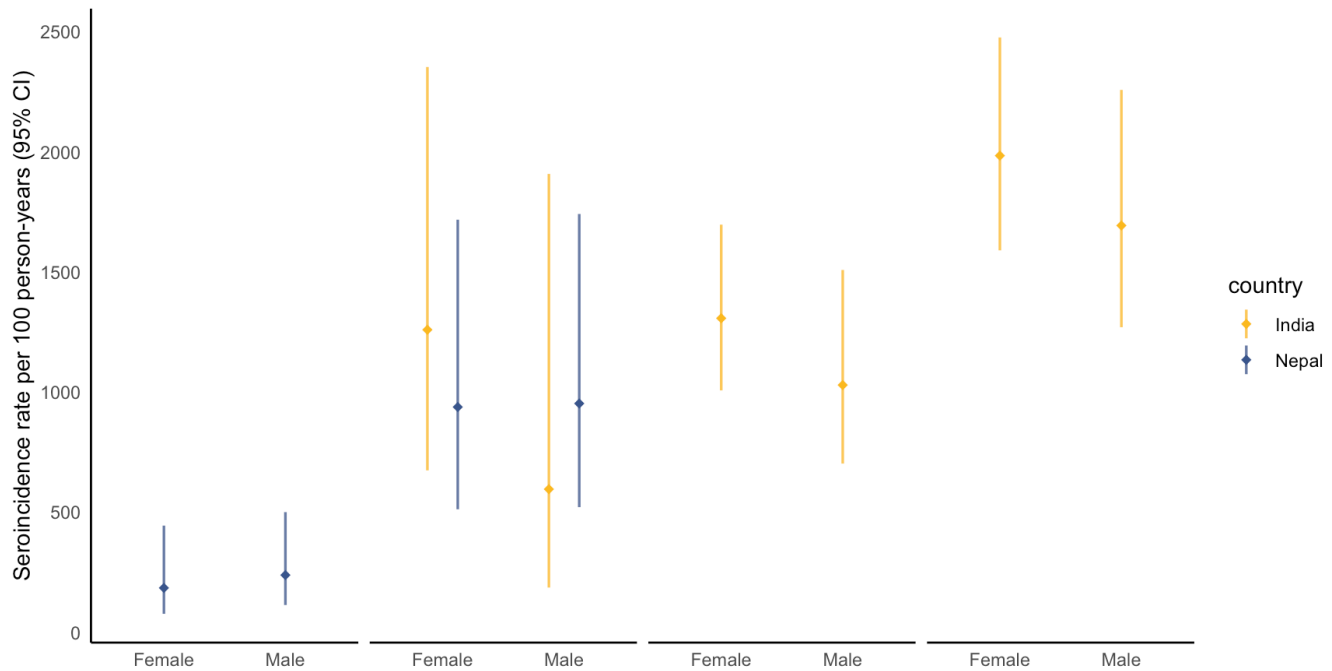

403

404 **References**

- 405
- 406 1. Paris DH, Shelite TR, Day NP, Walker DH. Unresolved Problems Related to Scrub Typhus: A  
407 Seriously Neglected Life-Threatening Disease. *The American Journal of Tropical Medicine and*  
408 *Hygiene*. 2013 Aug 7;89(2):301–7.
- 409 2. Weitzel T, Dittrich S, López J, Phuklia W, Martinez-Valdebenito C, Velásquez K, et al. Endemic  
410 Scrub Typhus in South America. *N Engl J Med*. 2016 Sep 8;375(10):954–61.
- 411 3. Izzard L, Fuller A, Blacksell SD, Paris DH, Richards AL, Aukkanit N, et al. Isolation of a Novel  
412 *Orientia* Species (*O. chuto* sp. nov.) from a Patient Infected in Dubai. *Journal of Clinical*  
413 *Microbiology*. 2010 Dec;48(12):4404–9.
- 414 4. Thiga JW, Mutai BK, Eyako WK, Ng'ang'a Z, Jiang J, Richards AL, et al. High Seroprevalence  
415 of Antibodies against Spotted Fever and Scrub Typhus Bacteria in Patients with Febrile Illness,  
416 Kenya. *Emerg Infect Dis*. 2015 Apr;21(4):688–91.
- 417 5. Luce-Fedrow A, Lehman ML, Kelly DJ, Mullins K, Maina AN, Stewart RL, et al. A Review of  
418 Scrub Typhus (*Orientia tsutsugamushi* and Related Organisms): Then, Now, and Tomorrow.  
419 *Trop Med Infect Dis*. 2018 Jan 17;3(1):8.
- 420 6. Bonell A, Lubell Y, Newton PN, Crump JA, Paris DH. Estimating the burden of scrub typhus: A  
421 systematic review. *PLOS Neglected Tropical Diseases*. 2017 Sep 25;11(9):e0005838.
- 422 7. John R, Varghese GM. Scrub typhus: a reemerging infection. *Current Opinion in Infectious*  
423 *Diseases*. 2020 Oct;33(5):365–71.
- 424 8. Xu G, Walker DH, Jupiter D, Melby PC, Arcari CM. A review of the global epidemiology of  
425 scrub typhus. *PLOS Neglected Tropical Diseases*. 2017 Nov 3;11(11):e0006062.
- 426 9. Saraswati K, Phanichkrivalkosil M, Day NPJ, Blacksell SD. The validity of diagnostic cut-offs for  
427 commercial and in-house scrub typhus IgM and IgG ELISAs: A review of the evidence. *PLOS*  
428 *Neglected Tropical Diseases*. 2019 Feb 4;13(2):e0007158.
- 429 10. Blacksell SD, Tanganuchitcharnchai A, Nawtaisong P, Kantipong P, Laongnualpanich A, Day  
430 NPJ, et al. Diagnostic Accuracy of the InBios Scrub Typhus Detect Enzyme-Linked  
431 Immunoassay for the Detection of IgM Antibodies in Northern Thailand. *Clinical and Vaccine*  
432 *Immunology* [Internet]. 2015 Dec 9 [cited 2022 Feb 20]; Available from:  
433 <https://journals.asm.org/doi/abs/10.1128/CVI.00553-15>
- 434 11. Paris DH, Blacksell SD, Nawtaisong P, Jenjaroen K, Teeraratkul A, Chierakul W, et al.  
435 Diagnostic Accuracy of a Loop-Mediated Isothermal PCR Assay for Detection of *Orientia*  
436 *tsutsugamushi* during Acute Scrub Typhus Infection. *PLOS Neglected Tropical Diseases*. 2011  
437 Sep 13;5(9):e1307.
- 438 12. Aiemjoy K, Seidman JC, Saha S, Munira SJ, Sajib MSI, Sium SMA, et al. Estimating typhoid  
439 incidence from community-based serosurveys: a multicohort study. *The Lancet Microbe*  
440 [Internet]. 2022 Jun 21 [cited 2022 Jun 23];0(0). Available from:  
441 [https://www.thelancet.com/journals/lanmic/article/PIIS2666-5247\(22\)00114-8/fulltext](https://www.thelancet.com/journals/lanmic/article/PIIS2666-5247(22)00114-8/fulltext)

- 442 13. Trowbridge P, P. D, Premkumar PS, Varghese GM. Prevalence and risk factors for scrub  
443 typhus in South India. *Tropical Medicine & International Health*. 2017;22(5):576–82.
- 444 14. Bickel PJ, Klaassen CA, Bickel PJ, Ritov Y, Klaassen J, Wellner JA, et al. Efficient and  
445 adaptive estimation for semiparametric models. Vol. 2. Springer New York; 1998.
- 446 15. Arnold BF, Martin DL, Juma J, Mkocho H, Ochieng JB, Cooley GM, et al. Enteropathogen  
447 antibody dynamics and force of infection among children in low-resource settings. Ferguson  
448 NM, Jit M, White M, Leung DT, Azman A, editors. *eLife*. 2019 Aug 19;8:e45594.
- 449 16. Jewell NP, van der Laan M. Generalizations of current status data with applications. *Lifetime*  
450 *Data Anal*. 1995 Mar 1;1(1):101–9.
- 451 17. Wood SN. *Generalized additive models: an introduction with R*. Chapman and Hall/CRC; 2006.
- 452 18. Marra G, Wood SN. Coverage properties of confidence intervals for generalized additive model  
453 components. *Scandinavian Journal of Statistics*. 2012;39(1):53–74.
- 454 19. de Graaf WF, Kretzschmar MEE, Teunis PFM, Diekmann O. A two-phase within-host model for  
455 immune response and its application to serological profiles of pertussis. *Epidemics*. 2014  
456 Dec;9:1–7.
- 457 20. Teunis PFM, van Eijkeren JCH, de Graaf WF, Marinović AB, Kretzschmar MEE. Linking the  
458 seroresponse to infection to within-host heterogeneity in antibody production. *Epidemics*. 2016  
459 Sep;16:33–9.
- 460 21. Teunis PFM, van der Heijden OG, de Melker HE, Schellekens JFP, Versteegh FGA,  
461 Kretzschmar MEE. Kinetics of the IgG antibody response to pertussis toxin after infection with  
462 *B. pertussis*. *Epidemiol Infect*. 2002 Dec;129(3):479–89.
- 463 22. Hornik K, Leisch F, Zeileis A. JAGS: A program for analysis of Bayesian graphical models  
464 using Gibbs sampling. In: *Proceedings of DSC*. 2003.
- 465 23. Teunis PFM, van Eijkeren JCH. Estimation of seroconversion rates for infectious diseases:  
466 Effects of age and noise. *Stat Med*. 2020 Sep 20;39(21):2799–814.
- 467 24. Teunis PFM, van Eijkeren JCH, Ang CW, van Duynhoven YTHP, Simonsen JB, Strid MA, et al.  
468 Biomarker dynamics: estimating infection rates from serological data. *Stat Med*. 2012 Sep  
469 10;31(20):2240–8.
- 470 25. Varghese GM, Rajagopal VM, Trowbridge P, Purushothaman D, Martin SJ. Kinetics of IgM and  
471 IgG antibodies after scrub typhus infection and the clinical implications. *International Journal of*  
472 *Infectious Diseases*. 2018 Jun 1;71:53–5.

473
